# Supplementary material for: Unexpected Inhibitory Effect of Octenidine Dihydrochloride on Candida albicans Filamentation by Impairing Ergosterol Biosynthesis and Disrupting Cell Membrane Integrity
Source: MDPI journal article supplement (doi:10.3390/antibiotics12121675), 2023-11-28
Supplement: s1 [file s1]

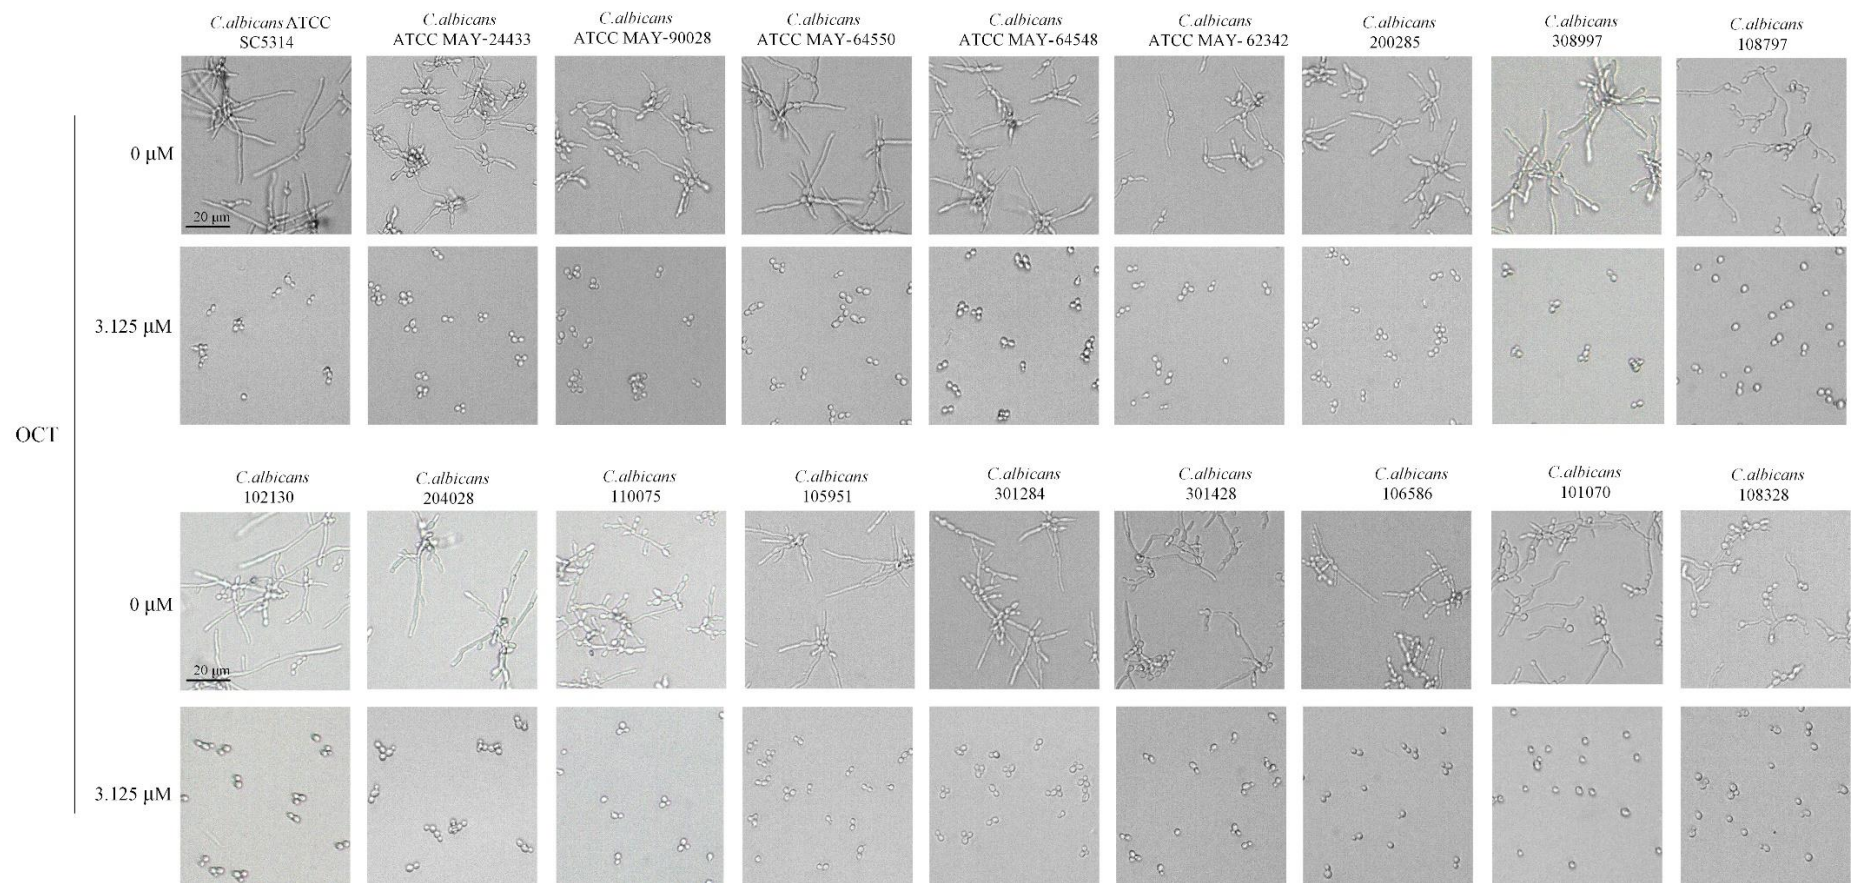

**Figure S1.** OCT inhibits filamentation of standard and clinical *C. albicans*. Cells were grown at 37°C for 4 h in the absence or presence of 3.125  $\mu\text{M}$  OCT. Data represent two biological replicates.

**Table S1. MHIC of 105 compounds**

| Product Name                        | MHIC<br>( $\mu$ M) | Target                                                                |
|-------------------------------------|--------------------|-----------------------------------------------------------------------|
| Aclacinomycin A hydrochloride       | 25                 | Antibiotic; Proteasome; Topoisomerase                                 |
| Almonertinib                        | 50                 | EGFR                                                                  |
| Almonertinib hydrochloride          | 50                 | EGFR                                                                  |
| Asenapine hydrochloride             | 50                 | 5-HT Receptor; Dopamine Receptor                                      |
| Azaphen dihydrochloride monohydrate | 100                | Serotonin Transporter                                                 |
| Bazedoxifene acetate                | 100                | Estrogen Receptor/ERR                                                 |
| Benfluorex hydrochloride            | 100                | Others                                                                |
| Benzbromarone                       | 100                | Apoptosis; Xanthine Oxidase                                           |
| Benzethonium chloride               | 12.5               | nAChR                                                                 |
| Bepridil hydrochloride hydrate      | 100                | Calcium Channel                                                       |
| Bepridil hydrochloride              | 100                | Calcium Channel                                                       |
| Bithionol                           | 50                 | Parasite                                                              |
| Blonanserin                         | 100                | 5-HT Receptor; Adrenergic Receptor; Dopamine Receptor; Sigma Receptor |
| Bronopol                            | 100                | Bacterial                                                             |
| Broxyquinoline                      | 6.25               | Parasite                                                              |
| Carmofur                            | 50                 | Nucleoside Antimetabolite/Analog; SARS-CoV; Virus Protease            |
| Carmustine                          | 100                | DNA Alkylator/Crosslinker                                             |
| Celecoxib                           | 100                | COX                                                                   |
| Ceritinib                           | 25                 | ALK; IGF-1R; Insulin Receptor                                         |

|                                      |      |                                                  |
|--------------------------------------|------|--------------------------------------------------|
| Ceritinib dihydrochloride            | 25   | ALK; IGF-1R; Insulin Receptor                    |
| Cetylpyridinium chloride monohydrate | 12.5 | Bacterial                                        |
| Cetylpyridinium chloride             | 12.5 | Bacterial; HBV                                   |
| Chlorhexidine                        | 25   | Antibiotic; Bacterial                            |
| Chlorhexidine digluconate            | 100  | Antibiotic; Bacterial                            |
| Chlormethine hydrochloride           | 100  | Others                                           |
| Chloroxine                           | 6.25 | Antibiotic; Bacterial                            |
| Chloroxylonol                        | 100  | Bacterial; Influenza Virus                       |
| Chlorprothixene                      | 100  | Bacterial; Dopamine Receptor; Histamine Receptor |
| Chlorquinaldol                       | 25   | Antibiotic; Bacterial; Fungal                    |
| Ciclopirox                           | 25   | Autophagy; Bacterial; Ferroptosis; Fungal        |
| Ciclopirox olamine                   | 25   | Bacterial; Ferroptosis; Fungal                   |
| Cinacalcet                           | 50   | CaSR                                             |
| Cinacalcet hydrochloride             | 50   | CaSR                                             |
| Clioquinol                           | 6.25 | Antibiotic; Autophagy; Fungal; Mitophagy         |
| Clomiphene citrate                   | 100  | Estrogen Receptor/ERR                            |
| Crisaborole                          | 100  | Phosphodiesterase (PDE)                          |
| Cyclandelate                         | 100  | Others                                           |
| Dacomitinib                          | 100  | Apoptosis; EGFR                                  |
| Dalbavancin hydrochloride            | 50   | Antibiotic; Bacterial                            |
| Demecarium bromide                   | 100  | AChE                                             |
| Diclazuril                           | 100  | Antibiotic; Parasite                             |

|                                 |      |                                                                                               |
|---------------------------------|------|-----------------------------------------------------------------------------------------------|
| Diiodohydroxyquinoline          | 50   | Antibiotic; Bacterial                                                                         |
| Disulfiram                      | 25   | Aldehyde Dehydrogenase (ALDH);<br>Interleukin Related; Pyroptosis                             |
| Domiphen bromide                | 12.5 | Potassium Channel                                                                             |
| Dronedarone                     | 100  | Adrenergic Receptor; Autophagy;<br>Calcium Channel; Cytochrome P450;<br>mAChR; Sodium Channel |
| Dronedarone hydrochloride       | 100  | Autophagy; Potassium Channel                                                                  |
| Efavirenz                       | 100  | Autophagy; HIV; Reverse Transcriptase                                                         |
| Efloxate                        | 100  | Others                                                                                        |
| Ethacridine lactate monohydrate | 100  | Bacterial                                                                                     |
| Fingolimod                      | 50   | LPL Receptor; PAK                                                                             |
| Flupentixol dihydrochloride     | 50   | Others                                                                                        |
| Hemin                           | 100  | Autophagy; Ferroptosis; Mitophagy                                                             |
| (+)-Kavain                      | 100  | Calcium Channel; GABA Receptor;<br>Sodium Channel                                             |
| Hexylresorcinol                 | 100  | Apoptosis; Bacterial; Glucosidase;<br>Parasite                                                |
| Lasofoxifene tartrate           | 100  | Estrogen Receptor/ERR                                                                         |
| Lomustine                       | 50   | Apoptosis; Autophagy; DNA<br>Alkylator/Crosslinker                                            |
| Magnolol                        | 50   | Autophagy; Bacterial; PPAR; RAR/RXR                                                           |
| Menadione                       | 50   | Endogenous Metabolite                                                                         |
| Menadione bisulfite sodium      | 100  | Others                                                                                        |
| Merbromin                       | 50   | Bacterial                                                                                     |

|                            |       |                                                                              |
|----------------------------|-------|------------------------------------------------------------------------------|
| Metergoline                | 100   | 5-HT Receptor; Dopamine Receptor;<br>Sodium Channel                          |
| Miltefosine                | 50    | Akt; HIV                                                                     |
| Natamycin                  | 25    | Antibiotic; Endogenous Metabolite;<br>Fungal                                 |
| Netupitant                 | 50    | Neurokinin Receptor                                                          |
| Nitroxoline                | 25    | Antibiotic; Autophagy; Bacterial                                             |
| Octenidine dihydrochloride | 3.125 | Bacterial                                                                    |
| Oritavancin diphosphate    | 100   | Antibiotic; Bacterial                                                        |
| Osimertinib                | 50    | EGFR                                                                         |
| Osimertinib dimesylate     | 50    | EGFR                                                                         |
| Osimertinib mesylate       | 50    | EGFR                                                                         |
| Otilonium bromide          | 12.5  | mAChR                                                                        |
| Oxethazaine                | 100   | HBV                                                                          |
| Ozanimod                   | 100   | LPL Receptor                                                                 |
| Perhexiline maleate        | 100   | Others                                                                       |
| Perphenazine               | 100   | 5-HT Receptor; Adrenergic Receptor;<br>Dopamine Receptor; Histamine Receptor |
| Phenazine methylsulfate    | 100   | Antibiotic; Apoptosis; Bacterial                                             |
| Pimavanserin               | 100   | 5-HT Receptor                                                                |
| Pimavanserin tartrate      | 50    | 5-HT Receptor                                                                |
| Pinaverium bromide         | 100   | Calcium Channel                                                              |
| Piroctone olamine          | 25    | Fungal                                                                       |
| Ponatinib                  | 100   | Autophagy; Bcr-Abl; FGFR; PDGFR;<br>Src; VEGFR                               |
| Raloxifene hydrochloride   | 100   | Autophagy; Estrogen Receptor/ERR                                             |

|                               |       |                                                                  |
|-------------------------------|-------|------------------------------------------------------------------|
| Riluzole                      | 100   | GABA Receptor; Sodium Channel                                    |
| Rolapitant                    | 100   | Neurokinin Receptor                                              |
| Salicylanilide                | 100   | HIV; HIV Integrase                                               |
| Sertindole                    | 100   | 5-HT Receptor; Adrenergic Receptor; Autophagy; Dopamine Receptor |
| Sertraline hydrochloride      | 100   | Serotonin Transporter                                            |
| Silver sulfadiazine           | 12.5  | Antibiotic; Bacterial; DNA/RNA Synthesis                         |
| Succimer                      | 100   | Others                                                           |
| Sultiame                      | 100   | Carbonic Anhydrase                                               |
| Tafenoquine succinate         | 12.5  | Parasite                                                         |
| Tamoxifen                     | 50    | Apoptosis; Autophagy; Estrogen Receptor/ERR; HSP                 |
| Tamoxifen citrate             | 50    | Apoptosis; Autophagy; Estrogen Receptor/ERR; HSP                 |
| Tavaborole                    | 3.125 | Antibiotic; Fungal                                               |
| Tegaserod maleate             | 100   | 5-HT Receptor                                                    |
| Thioridazine hydrochloride    | 100   | 5-HT Receptor; Autophagy; Dopamine Receptor                      |
| Thonzonium bromide            | 3.125 | Bacterial; Proton Pump                                           |
| Toremifene citrate            | 25    | Apoptosis; Estrogen Receptor/ERR                                 |
| Triclabendazole               | 100   | Microtubule/Tubulin; Parasite                                    |
| Triclosan                     | 50    | Antibiotic; Autophagy; Bacterial; Fungal                         |
| Triflupromazine hydrochloride | 50    | Autophagy; Dopamine Receptor                                     |
| Visomitin                     | 6.25  | Reactive Oxygen Species                                          |
| Vortioxetine                  | 50    | 5-HT Receptor; Serotonin Transporter                             |

|                           |           |                                      |
|---------------------------|-----------|--------------------------------------|
| Vortioxetine hydrobromide | 50        | 5-HT Receptor; Serotonin Transporter |
| Zinc pyrithione           | <u>25</u> | Bacterial; Fungal; Proton Pump       |

**Table S2. Strains used in this study**

| No. | Strain                            | genotype                                                            | Source or reference                   |
|-----|-----------------------------------|---------------------------------------------------------------------|---------------------------------------|
| 1   | SN152                             | <i>his1 /his1 arg4/arg4 leu2/leu2</i>                               | Eukaryot Cell. 2005 Feb;4(2):298-309. |
| 2   | <i>hst7Δ/hst7Δ</i>                | <i>hst7::HIS1 /hst7::ARG4 leu2/leu2</i>                             | This study                            |
| 3   | <i>rim101Δ/rim101Δ</i>            | <i>rim101::HIS1 /rim101::ARG4 leu2 /leu2</i>                        |                                       |
| 4   | P <sub>ADH1</sub> - <i>HST7</i>   | <i>his1 /his1 ADE2 /ade2:: P<sub>ADH1</sub>-HST7-ARG4 leu2/leu2</i> |                                       |
| 5   | P <sub>ADH1</sub> - <i>RIM101</i> | <i>his1 /his1 ADE2 /ade2:: PADH1-RIM101-ARG4 leu2/leu2</i>          | mBio. 2023 Jan-Feb; 14(1): e02639-22. |
| 6   | <i>erg1Δ/erg1Δ</i>                | <i>erg1::HIS1 /erg1::ARG4 leu2 /leu2</i>                            |                                       |
| 7   | <i>erg2Δ/erg2Δ</i>                | <i>erg2::HIS1 /erg2::ARG4 leu2 /leu2</i>                            |                                       |
| 8   | <i>erg3Δ/erg3Δ</i>                | <i>erg3::HIS1 /erg3::ARG4 leu2 /leu2</i>                            |                                       |
| 9   | <i>erg4Δ/erg4Δ</i>                | <i>erg4::HIS1 /erg4::ARG4 leu2 /leu2</i>                            |                                       |
| 10  | <i>erg5Δ/erg5Δ</i>                | <i>erg5::HIS1 /erg5::ARG4 leu2 /leu2</i>                            |                                       |
| 11  | <i>erg6Δ/erg6Δ</i>                | <i>erg6::HIS1 /erg6::ARG4 leu2 /leu2</i>                            |                                       |
| 12  | <i>erg24Δ/erg24Δ</i>              | <i>erg24::HIS1 /erg24::ARG4 leu2 /leu2</i>                          |                                       |
| 13  | <i>erg25Δ/erg25Δ</i>              | <i>erg25::HIS1 /erg25::ARG4 leu2 /leu2</i>                          |                                       |
| 14  | <i>upc2Δ/upc2Δ</i>                | <i>upc2::HIS1 /upc2::ARG4 leu2 /leu2</i>                            |                                       |



**Table S3. Primers used in this study**

| No.                                     | Primer name   | Primer sequence (5'to3')                                     |
|-----------------------------------------|---------------|--------------------------------------------------------------|
| <b>Primers for genes deletion</b>       |               |                                                              |
| 1                                       | Hst7P1        | ATAGAACTCCACAGGCGCT                                          |
| 2                                       | Hst7P3        | cacggcgcgcctagcagcggTGTGAGGTGGAGTATGAAT                      |
| 3                                       | Hst7P4        | gtcagcgccgcgcctccctgcCACAACCTCATATACATATAC                   |
| 4                                       | Hst7P6        | CAAGAGATGTTCAACTACAT                                         |
| 5                                       | Hst7Upcheck   | TATAAGTTGCGACGAAGCCT                                         |
| 6                                       | Hst7Dncheck   | TTTTGTTGGATTTGGCTGAT                                         |
| 7                                       | Rim101P1      | CTTGGCAATCAATTCCCAGA                                         |
| 8                                       | Rim101P3      | cacggcgcgcctagcagcggTGTCTAAAAATCTCGTTTGT                     |
| 9                                       | Rim101P4      | gtcagcgccgcgcctccctgcGCAATTATACCGATTTTACT                    |
| 10                                      | Rim101P6      | GTTGTGTCTCCAATCATTGC                                         |
| 11                                      | Rim101Upcheck | TGTACTCACTCACAGCCCCCT                                        |
| 12                                      | Rim101Dncheck | AGGTCACGATAACCCCAAGT                                         |
| 13                                      | ARG4 Left     | TTCAACCTTTCAAACGATGC                                         |
| 14                                      | ARG4 Right    | TCGATACATTTGCGGTACAG                                         |
| 15                                      | HIS1 Left     | ATTAGATACGTTGGTGGTTC                                         |
| 16                                      | HIS1 Right    | AACACAACCTGCACAATCTGG                                        |
| 17                                      | Universal 2   | ccgctgctaggcgcgcgctgACCAGTGTGATGGATATCTGC                    |
| 18                                      | Universal 5   | gcagggatgcggccgctgacAGCTCGGATCCACTAGTAACG                    |
| <b>Primers for genes overexpression</b> |               |                                                              |
| 19                                      | Rim101F1      | ATAGATATTACATACAAGTTTTTAACCTAGACAAACGAGTGCCACCTGACGTCTAAGAA  |
| 20                                      | Rim101F2      | TCTTTCAACAACCTAACTAATTTTATACTATCCACCAACTATAGATATTACATACAAGTT |
| 21                                      | Rim101R1      | AGCATTTAAGTATGTTACGGGATGAATGTTGTAATTCATCGGTATGACCATGATTACCT  |

|    |                   |                                                              |
|----|-------------------|--------------------------------------------------------------|
| 22 | Rim101R2          | GTGACTTGCAGTACTCTCACTTGCACCGGTATTGCTATCAGCATTTAAGTATGTTACGG  |
| 23 | Tet-Rim101Dncheck | TGGGTATAAGATTGCAGAGC                                         |
| 24 | Hst7F1            | TTGTTTCATTGTTTTTGCTCATTCTACTCCACCTCAACATGCCACCTGACGTCTAAGAA  |
| 25 | Hst7F2            | TTGAATATATTAATAATAAAATTATAATAACAGGTTTGCTTGTTTCATTGTTTTTGCTCA |
| 26 | Hst7R1            | TGTAGCTTCTTGTGTATCTATACGAGTTGTTCTTGTCATCGGTATGACCATGATTACCT  |
| 27 | Hst7R2            | TGATAATGGTGAAGGCACTGGTGGTAAATCCTTATGCTTTGTAGCTTCTTGTGTATCTA  |
| 28 | Tet-Hst7Dncheck   | AGGGGATTTCTGTGCAAATT                                         |
| 29 | VP16              | AATGCCAATACTCCTCTTTCTC                                       |
| 30 | VP17              | TCAACAAACTCTTTCAACTTCTCA                                     |

---
